# Supplementary material
Source: MDPI journal article supplement (https://www.mdpi.com/2077-1312/11/11/2193)
Supplement: s1 [file s1]

Supplementary Material

**Table S1.** Three-way analysis of Variance (ANOVA) results in *Pyropia yezoensis* on the relative growth rate at different  $p\text{CO}_2$  concentrations, light intensities and salinity levels. df: degree of freedom, F: the value of F statistic, and Sig.:  $p$  value.

|                                | df | F      | Sig.   |
|--------------------------------|----|--------|--------|
| <b>Growth</b>                  |    |        |        |
| $p\text{CO}_2$                 | 1  | 0.22   | 0.648  |
| Ligh                           | 1  | 117.48 | <0.001 |
| Salinity                       | 1  | 9.82   | 0.006  |
| $p\text{CO}_2$ *Light          | 1  | 0.30   | 0.593  |
| $p\text{CO}_2$ *Salinity       | 1  | 0.24   | 0.633  |
| Light*Salinity                 | 1  | 0.10   | 0.757  |
| $p\text{CO}_2$ *Light*Salinity | 1  | 0.50   | 0.492  |

**Table S2.** Three-way analysis of Variance (ANOVA) results in *Pyropia yezoensis* on the chlorophyll fluorescence parameters at different  $p\text{CO}_2$  concentrations, light intensities and salinity levels. df: degree of freedom, F: the value of F statistic, and Sig.:  $p$  value.

|                                | df | F     | Sig.   |
|--------------------------------|----|-------|--------|
| <b>rETR<sub>max</sub></b>      |    |       |        |
| $p\text{CO}_2$                 | 1  | 5.96  | 0.027  |
| Ligh                           | 1  | 26.41 | <0.001 |
| Salinity                       | 1  | 38.73 | <0.001 |
| $p\text{CO}_2$ *Light          | 1  | 0.01  | 0.937  |
| $p\text{CO}_2$ *Salinity       | 1  | 1.35  | 0.262  |
| Light*Salinity                 | 1  | 0.41  | 0.530  |
| $p\text{CO}_2$ *Light*Salinity | 1  | 0.09  | 0.764  |
| <b><math>\alpha</math></b>     |    |       |        |
| $p\text{CO}_2$                 | 1  | 0.04  | 0.837  |
| Ligh                           | 1  | 3.49  | 0.080  |
| Salinity                       | 1  | 2.27  | 0.152  |
| $p\text{CO}_2$ *Light          | 1  | 1.31  | 0.270  |
| $p\text{CO}_2$ *Salinity       | 1  | 5.49  | 0.033  |
| Light*Salinity                 | 1  | <0.01 | 0.993  |
| $p\text{CO}_2$ *Light*Salinity | 1  | 2.24  | 0.154  |
| <b>I<sub>k</sub></b>           |    |       |        |
| $p\text{CO}_2$                 | 1  | 1.05  | 0.321  |
| Ligh                           | 1  | 25.74 | <0.001 |
| Salinity                       | 1  | 5.51  | 0.032  |
| $p\text{CO}_2$ *Light          | 1  | 0.89  | 0.361  |
| $p\text{CO}_2$ *Salinity       | 1  | 10.26 | 0.006  |
| Light*Salinity                 | 1  | 0.24  | 0.631  |
| $p\text{CO}_2$ *Light*Salinity | 1  | 3.59  | 0.077  |

**Table S3.** Three-way analysis of Variance (ANOVA) results in *Pyropia yezoensis* on the pigments at different  $p\text{CO}_2$  concentrations, light intensities and salinity levels. df: degree of freedom, F: the value of F statistic, and Sig.:  $p$  value.

|                                   | df | F    | Sig.  |
|-----------------------------------|----|------|-------|
| <b>Chlorophyll <math>a</math></b> |    |      |       |
| $p\text{CO}_2$                    | 1  | 5.29 | 0.035 |
| Ligh                              | 1  | 0.33 | 0.576 |

|                                |   |       |        |
|--------------------------------|---|-------|--------|
| Salinity                       | 1 | 1.97  | 0.180  |
| $p\text{CO}_2$ *Light          | 1 | 0.87  | 0.365  |
| $p\text{CO}_2$ *Salinity       | 1 | 6.40  | 0.022  |
| Light*Salinity                 | 1 | 0.05  | 0.829  |
| $p\text{CO}_2$ *Light*Salinity | 1 | 0.87  | 0.365  |
| <b>Carotenoids</b>             |   |       |        |
| $p\text{CO}_2$                 | 1 | 2.75  | 0.117  |
| Ligh                           | 1 | 3.13  | 0.096  |
| Salinity                       | 1 | 2.56  | 0.129  |
| $p\text{CO}_2$ *Light          | 1 | 1.05  | 0.321  |
| $p\text{CO}_2$ *Salinity       | 1 | 7.21  | 0.016  |
| Light*Salinity                 | 1 | 0.03  | 0.874  |
| $p\text{CO}_2$ *Light*Salinity | 1 | 0.61  | 0.447  |
| <b>Phycoerythrin</b>           |   |       |        |
| $p\text{CO}_2$                 | 1 | 0.32  | 0.579  |
| Ligh                           | 1 | 38.93 | <0.001 |
| Salinity                       | 1 | 0.50  | 0.491  |
| $p\text{CO}_2$ *Light          | 1 | 0.77  | 0.392  |
| $p\text{CO}_2$ *Salinity       | 1 | 4.05  | 0.061  |
| Light*Salinity                 | 1 | 0.13  | 0.721  |
| $p\text{CO}_2$ *Light*Salinity | 1 | 0.36  | 0.556  |

**Table S4.** Three-way analysis of Variance (ANOVA) results in *Pyropia yezoensis* on soluble sugar at different  $p\text{CO}_2$  concentrations, light intensities and salinity levels. df: degree of freedom, F: the value of F statistic, and Sig.: p value.

|                                | df | F    | Sig.  |
|--------------------------------|----|------|-------|
| <b>Soluble sugar</b>           |    |      |       |
| $p\text{CO}_2$                 | 1  | 0.32 | 0.579 |
| Ligh                           | 1  | 0.32 | 0.583 |
| Salinity                       | 1  | 0.29 | 0.600 |
| $p\text{CO}_2$ *Light          | 1  | 1.35 | 0.263 |
| $p\text{CO}_2$ *Salinity       | 1  | 2.55 | 0.130 |
| Light*Salinity                 | 1  | 1.77 | 0.202 |
| $p\text{CO}_2$ *Light*Salinity | 1  | 0.25 | 0.625 |
